# Supplementary material
Source: PubMed Central journal article supplement (PMC4483591)
Supplement: ASN.2014060588_ASN2014060588SupplementaryData.pdf [file ASN.2014060588_ASN2014060588SupplementaryData.pdf]

**Table S1. Combined (n =703) Demographics<sup>a</sup>.**

| Recipient and donor characteristics                     | All kidneys <sup>b</sup><br>(n = 564) | Kidneys that <b>did not</b><br>progress to failure after<br>the biopsy <sup>b</sup><br>(n = 436) | Kidneys that<br>progressed to failure<br>after the biopsy <sup>b</sup><br>(n = 128) | P value <sup>d</sup><br>(Failed vs working) |
|---------------------------------------------------------|---------------------------------------|--------------------------------------------------------------------------------------------------|-------------------------------------------------------------------------------------|---------------------------------------------|
| Mean recipient age (years)                              | 49 (10 – 86)                          | 49 (10 – 86)                                                                                     | 46 (18 – 74)                                                                        | 0.02                                        |
| Recipient Gender (% male)                               | 365 (65%)                             | 277 (64%)                                                                                        | 88 (69%)                                                                            | 0.28                                        |
| <b>Race</b>                                             |                                       |                                                                                                  |                                                                                     |                                             |
| Caucasian                                               | 421 (75%)                             | 332 (76%)                                                                                        | 89 (70%)                                                                            | 0.13                                        |
| Black                                                   | 45 (8%)                               | 34 (8%)                                                                                          | 11 (9%)                                                                             | 0.77                                        |
| Other                                                   | 72 (13%)                              | 52 (12%)                                                                                         | 20 (16%)                                                                            | 0.27                                        |
| NA                                                      | 26 (5%)                               | 18 (4%)                                                                                          | 8 (6%)                                                                              | 0.31                                        |
| <b>Primary disease</b>                                  |                                       |                                                                                                  |                                                                                     |                                             |
| Diabetic nephropathy                                    | 93 (16%)                              | 76 (17%)                                                                                         | 17 (13%)                                                                            | 0.27                                        |
| Hypertension / large vessel disease                     | 37 (7%)                               | 29 (7%)                                                                                          | 8 (6%)                                                                              | 0.87                                        |
| Glomerulonephritis / vasculitis                         | 156 (27%)                             | 106 (24%)                                                                                        | 50 (39%)                                                                            | 0.001                                       |
| Interstitial nephritis / pyelonephritis                 | 26 (5%)                               | 20 (5%)                                                                                          | 6 (5%)                                                                              | 0.96                                        |
| Polycystic kidney disease                               | 64 (11%)                              | 51 (12%)                                                                                         | 13 (10%)                                                                            | 0.63                                        |
| Other primary diseases <sup>c</sup>                     | 30 (7%)                               | 22 (5%)                                                                                          | 8 (6%)                                                                              | 0.59                                        |
| Unknown etiology                                        | 158 (27%)                             | 132 (29%)                                                                                        | 26 (20%)                                                                            | 0.04                                        |
| Mean donor age                                          | 41 (1 – 75)                           | 41 (2 – 75)                                                                                      | 39 (1 – 65)                                                                         | 0.16                                        |
| Donor gender (% male)                                   | 93 (16%)                              | 76 (17%)                                                                                         | 17 (13%)                                                                            | 0.27                                        |
| Donor type (% deceased donor transplants)               | 37 (7%)                               | 29 (7%)                                                                                          | 8 (6%)                                                                              | 0.87                                        |
| Clinical characteristics at time of biopsy              | All biopsies<br>(n = 703)             | Kidneys that <b>did not</b><br>progress to failure after<br>the biopsy <sup>b</sup><br>(n = 436) | Kidneys that<br>progressed to failure<br>after the biopsy <sup>b</sup><br>(n = 128) | P value<br>(Failed vs working)              |
| Median and range time from transplant to biopsy (days)  | 571 (3 – 12831)                       | 400 (3 - 12831)                                                                                  | 2149 (6 – 11453)                                                                    | <0.001                                      |
| Median follow up time (days)                            | 902 (0 - 3212)                        | 987 (0 - 3212)                                                                                   | 405 (0 – 2610)                                                                      | <0.001                                      |
| <b>Indication for biopsy</b>                            |                                       |                                                                                                  |                                                                                     |                                             |
| Primary non-function                                    | 11 (2%)                               | 6 (1%)                                                                                           | 2 (2%)                                                                              | 1.00                                        |
| Rapid deterioration of graft function                   | 161 (23%)                             | 85 (19%)                                                                                         | 46 (36%)                                                                            | <0.001                                      |
| Slow deterioration of graft function                    | 216 (31%)                             | 137 (31%)                                                                                        | 32 (25%)                                                                            | 0.16                                        |
| Stable impaired graft function                          | 88 (13%)                              | 53 (12%)                                                                                         | 14 (11%)                                                                            | 0.71                                        |
| Investigate proteinuria                                 | 103 (15%)                             | 66 (15%)                                                                                         | 19 (15%)                                                                            | 0.93                                        |
| Follow-up from previous biopsy                          | 20 (3%)                               | 10 (2%)                                                                                          | 4 (3%)                                                                              | 0.53                                        |
| Others                                                  | 76 (11%)                              | 22 (5%)                                                                                          | 8 (6%)                                                                              | 0.59                                        |
| Indication unknown                                      | 28 (4%)                               | 57 (13%)                                                                                         | 3 (2%)                                                                              | <0.001                                      |
| <b>Maintenance immunosuppressive regimens at biopsy</b> |                                       |                                                                                                  |                                                                                     |                                             |
| MMF, tacrolimus, steroid                                | 259 (37%)                             | 163 (37%)                                                                                        | 34 (27%)                                                                            | 0.02                                        |
| MMF, cyclosporine, steroid                              | 125 (18%)                             | 63 (14%)                                                                                         | 29 (23%)                                                                            | 0.03                                        |
| Others                                                  | 319 (45%)                             | 210 (48%)                                                                                        | 65 (51%)                                                                            | 0.60                                        |
| <b>HLA antibody assessment at time of biopsy</b>        |                                       |                                                                                                  |                                                                                     |                                             |
| DSA positive                                            | 209 (29%)                             | 99 (23%)                                                                                         | 64 (50%)                                                                            | <0.001                                      |
| Non-donor specific HLA antibodies                       | 133 (19%)                             | 85 (19%)                                                                                         | 17 (13%)                                                                            | 0.11                                        |
| No HLA antibodies                                       | 268 (38%)                             | 176 (40%)                                                                                        | 34 (27%)                                                                            | <0.001                                      |
| Not tested                                              | 93 (13%)                              | 76 (17%)                                                                                         | 13 (10%)                                                                            | 0.047                                       |
| <b>HLA antibody assessment at time of transplant</b>    |                                       |                                                                                                  |                                                                                     |                                             |
| PRA positive                                            | 144 (20%)                             | 98 (22%)                                                                                         | 23 (18%)                                                                            | 0.27                                        |
| PRA negative                                            | 405 (58%)                             | 233 (53%)                                                                                        | 69 (54%)                                                                            | 0.93                                        |
| No data available                                       | 154 (22%)                             | 105 (24%)                                                                                        | 36 (28%)                                                                            | 0.35                                        |

<sup>a</sup> The centers included University of Alberta, Edmonton, AB, Canada; University of Minnesota, Minneapolis, MN, USA; Manchester Royal Infirmary, Manchester, England; University of Maryland School of Medicine, Baltimore, MD, USA; Hospital Vall d'Hebron, Barcelona, Spain; Hennepin County Medical Center, Minneapolis, MN, USA; Medical School of Hannover, Hannover, Germany; and University of Illinois, Chicago, IL, USA

<sup>b</sup> We selected one random biopsy per kidney.

<sup>c</sup> Other primary diseases included membranous nephropathy, miscellaneous, neoplasms/tumors, nephrolithiasis, reflux nephropathy, and scleroderma. <sup>d</sup> Chi-square test, Fisher's exact test or Student's t test used for statistical analyses
